# Supplementary material for: Phylogenetic Analysis of Bird-Virulent West Nile Virus Strain, Greece
Source: PubMed Central journal article supplement (PMC6874256; doi:10.3201/eid2512.181225), 2019-12
Supplement: 18-1225-Techapp-s1.pdf [file 18-1225-Techapp-s1.pdf]

# Phylogenetic Analysis of Bird-Virulent West Nile Virus Strain, Greece

## Appendix

**Appendix Table.** Primers used in analysis of bird-virulent strain of West Nile virus, Greece

| Primer name | Sequence primer (5' →3') | Nea Santa-Greece-2010 nt position | Bibliography |
|-------------|--------------------------|-----------------------------------|--------------|
| F1          | AGTAGTTCGCCTGTGTGAG      | 1–19                              | This study   |
| R1          | GCCTTCCAGTACCAGATCAA     | 1028–1047                         |              |
| F2          | TDGGAATGAGYAACAGRGAC     | 979–996                           | (1)          |
| R2          | TGRTT DATCTGBTGWTCTCCT   | 2130–2150                         |              |
| F3          | GTTCTCAAGCAATACTGTGAAG   | 1785–1806                         | (2)          |
| R3          | TTCCACCACGACACTCAA       | 2725–2742                         |              |
| F4          | GGAAGCCATTAAGGATGAG      | 2673–2691                         | (2)          |
| R4          | AAGAACACGACCAGAAGG       | 3561–3578                         |              |
| F5          | AGAATGGCTGTTGGTATGG      | 3446–3464                         | (2)          |
| R5          | CGTCCTCTCAATCCACAT       | 4372–4389                         |              |
| F6          | GCAGA ACTTGACATAGACTC    | 4282–4301                         | (2)          |
| R6          | TACAGCCGTCCTCAATCT       | 5257–5274                         |              |
| F7          | ACCTGAAATGTTGAGGAAGA     | 5151–5170                         | (2)          |
| R7          | CGGCATGTTGATGTTGTC       | 6100–6117                         |              |
| F8          | CATCACCACAGACATATCAGA    | 5829–5849                         | (2)          |
| R8          | AGCCATCCAGCAGAAGAA       | 6742–6759                         |              |
| F9          | CGGACGCCCTTCAGACAATA     | 6611–6630                         | (2)          |
| R9          | TCGTTACGGCATAGAGCGAC     | 7044–7059                         |              |
| F10         | CCTGTTGGGACACAAGCCA      | 6960–6978                         | This study   |
| R10         | CCAGATACAGAAAAGAAGCCATCA | 7757–7780                         |              |
| F11         | CAAGAGGGGTGGAGCCAAG      | 7677–7695                         | This study   |
| R11         | AGGAGAGGCTCCCTACTGC      | 8479–8498                         |              |
| F12         | GTGAACATGACAAGCCAGGTG    | 8380–8400                         | This study   |
| R12         | CTGAGTTCTTCTACCCAGCC     | 9179–9199                         |              |
| F13         | GAGTTCGGCAAAGCTAAAGGC    | 9079–9099                         | This study   |
| R13         | ACACTCTGTTCCAGACTGCG     | 10128–10147                       |              |
| F14         | TGGATGACGACGGAAGACATG    | 10105–10125                       | (3)          |
| R14         | GGGTCTCCTAACCTCTAGT      | 10825–10845                       |              |

## References

1. Fall G, Di Paola N, Faye M, Dia M, Freire CCM, Loucoubar C, et al. Biological and phylogenetic characteristics of West African lineages of West Nile virus. *PLoS Negl Trop Dis*. 2017;11:e0006078. [PubMed https://doi.org/10.1371/journal.pntd.0006078](https://doi.org/10.1371/journal.pntd.0006078)
2. Shahhosseini N, Chinikar S, Moosa-Kazemi SH, Sedaghat MM, Kayedi MH, Lühken R, et al. West Nile Virus lineage-2 in *Culex* specimens from Iran. *Trop Med Int Health*. 2017;22:1343–9. [PubMed https://doi.org/10.1111/tmi.12935](https://doi.org/10.1111/tmi.12935)
3. Pierre V, Drouet M-T, Deubel V. Identification of mosquito-borne flavivirus sequences using universal primers and reverse transcription/polymerase chain reaction. *Res Virol*. 1994;145:93–104. [PubMed https://doi.org/10.1016/S0923-2516\(07\)80011-2](https://doi.org/10.1016/S0923-2516(07)80011-2)

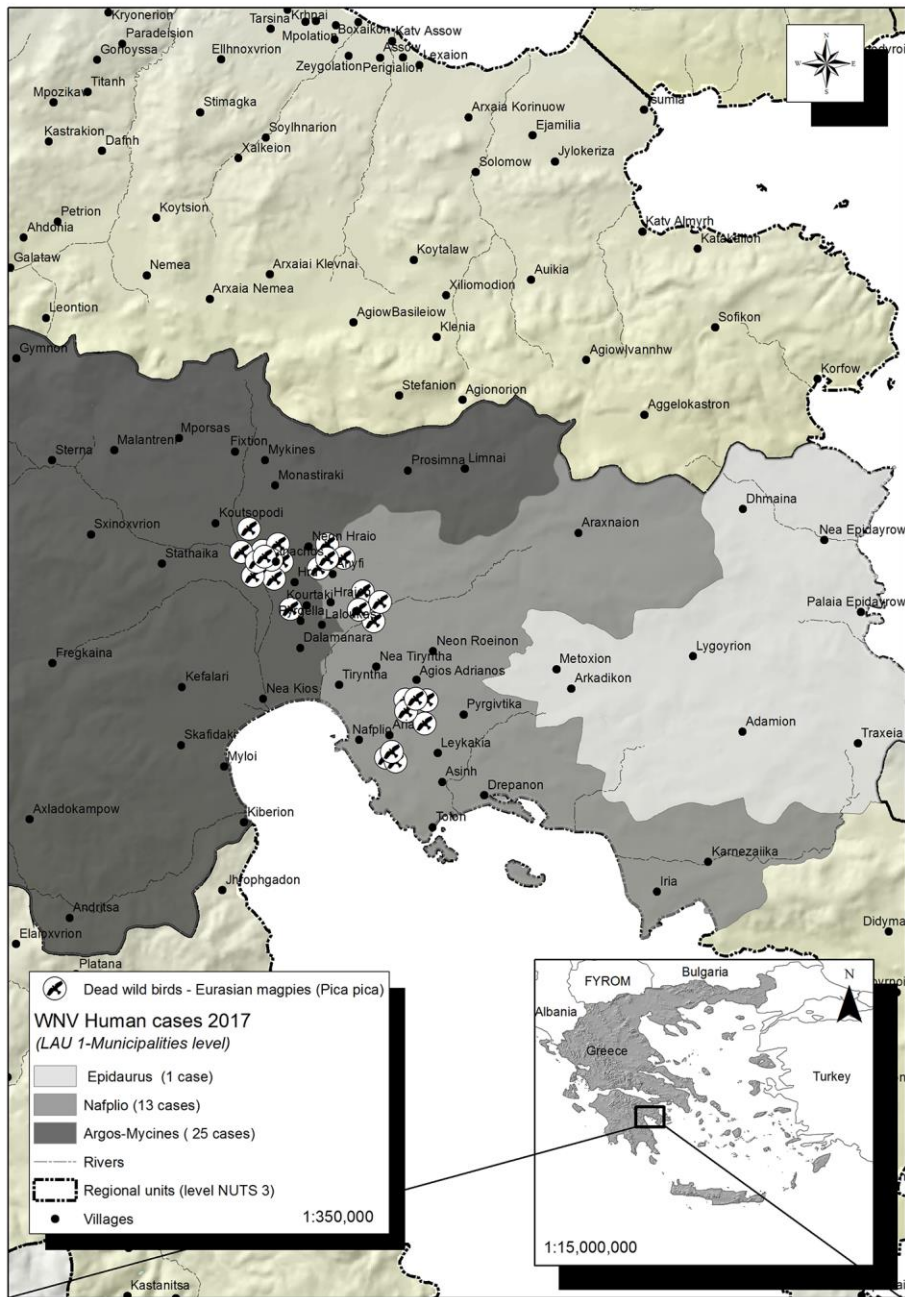

**Appendix Figure.** Area in which dead Eurasian magpies were collected during July and August 2017 in a study of bird-variant West Nile virus, Greece.
